# Supplementary material
Source: PubMed Central journal article supplement (PMC3502242)

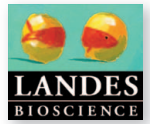

## **Supplemental Material to:**

**Isidro Hötzel, Frank-Peter Theil, Lisa J. Bernstein, Saileta Prabhu, Rong Deng, Leah Quintana, Jeff Lutman, Renuka Sibia, Pamela Chan, Daniela Bumbaca, Paul Fielder, Paul J. Carter and Robert F. Kelley**

**A strategy for risk mitigation of antibodies with fast clearance**

**mAbs 2012; 4(6)**

**<http://dx.doi.org/10.4161/mabs.22189>**

**<http://www.landesbioscience.com/journals/mabs/article/22189>**

Supplemental Figure 1. Lack of association between non-specific binding to a glass surface and clearance

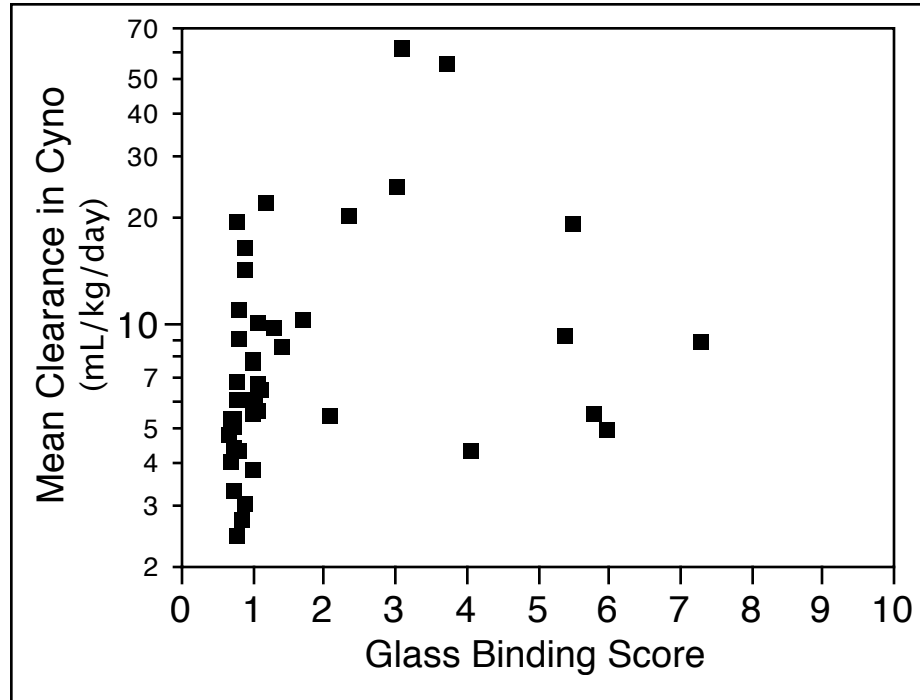

Supplemental Figure 2. Lack of association between clearance and retention time observed upon size-exclusion chromatography

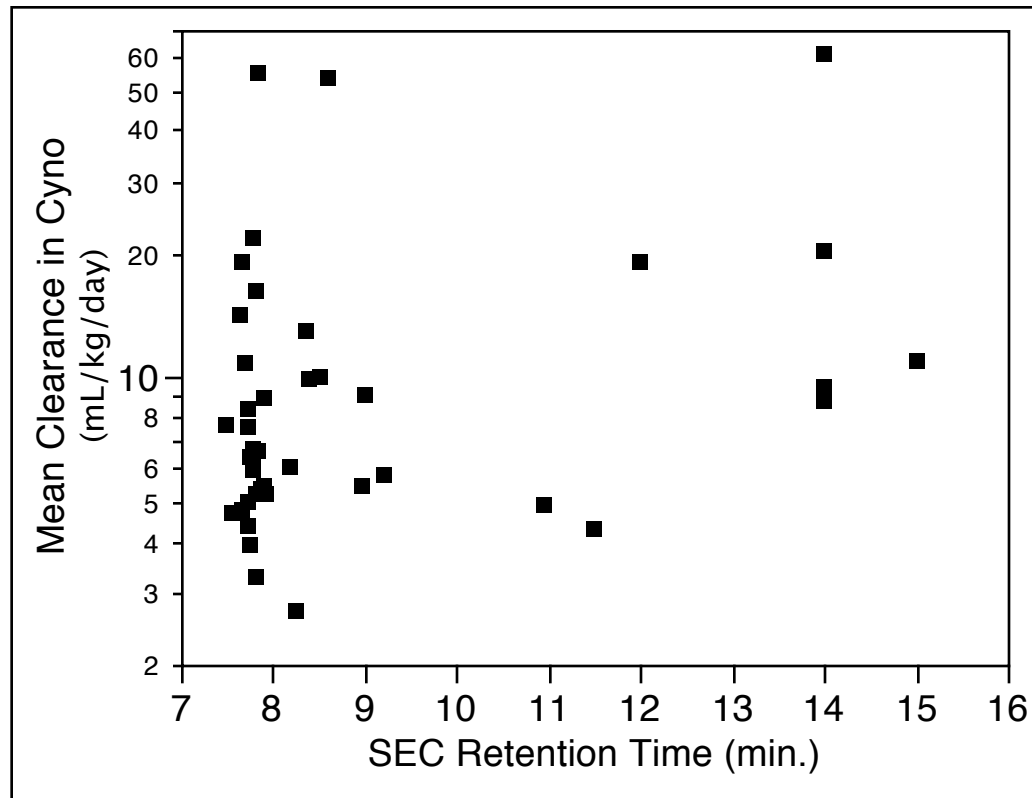

Supplemental Figure 3. Binding at pH 5.8 to FcRn with dissociation at pH 7.4 for antibody 47c with clearance of 4 mL/kg/day (A) or antibody 42 (clearance=14 mL/kg/day) (B). Antibody was immobilized and binding of varied FcRn (20 nM to 5  $\mu$ M in 2-fold increments) was measured. Injection of cyno FcRn in pH 5.8 buffer was at time zero with change to pH 7.4 buffer at end of injection (120 seconds).

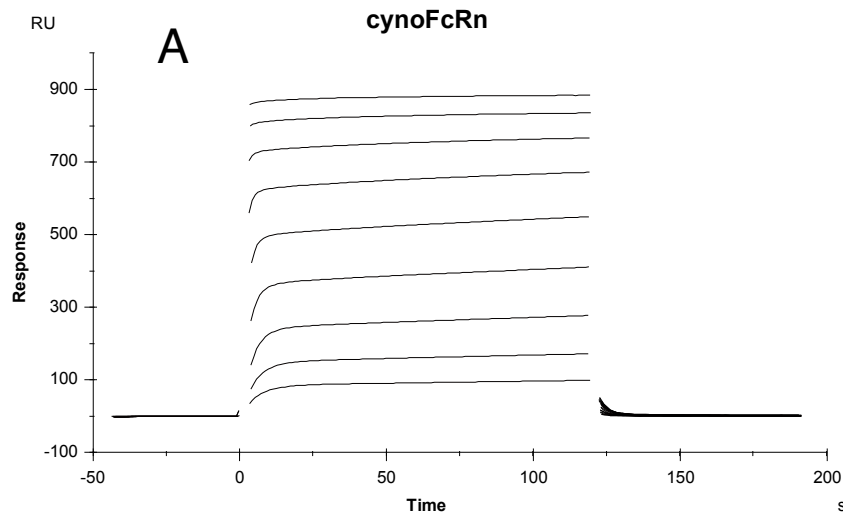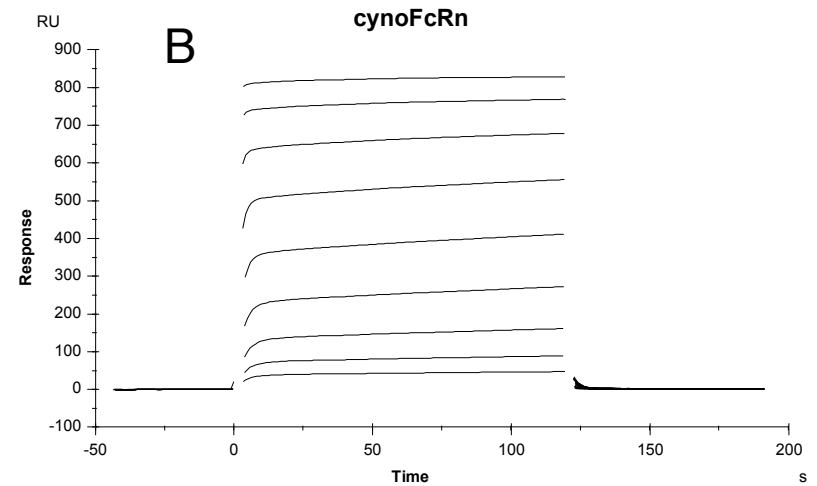

Supplemental Figure 4. Correlation of non-specific binding measured in baculovirus ELISA with non-specific binding to human 293 cells determined by FACS.

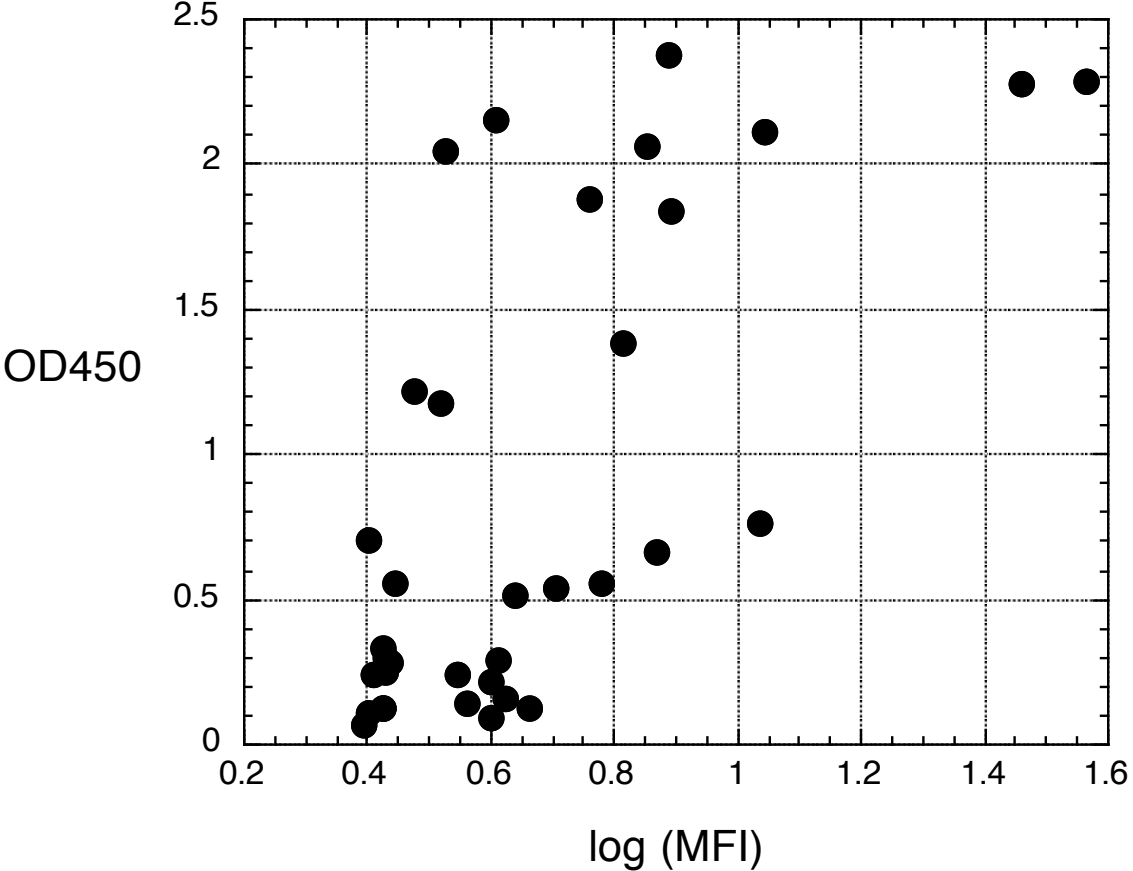

Supplement: mabs-4-753-s01.pdf [file mabs-4-753-s01.pdf]
